# Supplementary material for: Electron transport in crystalline PCBM-like fullerene derivatives: a comparative computational study
Source: Royal Society of Chemistry journal article supplement (doi:10.1039/c4tc00502c), 2014-01-01
Supplement: c4tc00502c1.zip [file c4tc00502c1.zip]

# Supporting Information for “Electron transport in crystalline PCBM-like fullerene derivatives: a comparative computational study”

Julien Idé, Daniele Fazzi, Mosè Casalegno, Stefano V. Meille, Guido Raos

June 6, 2014

## 1 Adiabatic and non-adiabatic free energy barriers

In the non-adiabatic (na) approximation, the coupling between the initial and final electronic states involved in an electron transfer (ET) reaction is neglected (weak coupling approximation), so that the free energy barrier of the reaction is determined from the initial and final non-interacting diabatic states. In the case of a non-symmetrical ET reaction, as illustrated in figure S1, the diabatic potential energy surfaces of the initial and final states can be approximated by the parabolic functions:

$$V_i(q) = 1/2f(q - q_i)^2 \quad (1)$$

$$V_f(q) = 1/2f(q - q_f)^2 + \Delta E_{if} \quad (2)$$

where  $q_i$  and  $q_f$  denote the value of the reaction coordinate at the initial and final states, i.e. to the system geometry before and after ET.  $f$  is the curvature of the two parabolas (assumed for simplicity to have identical values in the two states) and  $\Delta E_{if}$  the energy difference between the final and initial states at their equilibrium geometries. The crossing point of the two parabolas ( $q = q_c$ ) is determined by the condition of equality of the two potential energy curves:

$$q_c = \frac{\Delta E_{if}}{f} \left( \frac{1}{q_f - q_i} \right) + (q_f + q_i) / 2. \quad (3)$$

Taking the energy origin at the minimum of the initial state parabola, the non-adiabatic free energy barrier can be written as:

$$\Delta E_{na}^\ddagger = V_i(q_c) - V_i(q_i) = 1/2f(q_c - q_i)^2 \quad (4)$$

Then, substituting  $q_c$  in the previous equation leads to the expression:

$$\Delta E_{na}^\ddagger = (\lambda + \Delta E_{if})^2 / 4\lambda \text{ with } \lambda = 1/2f(q_i - q_f)^2 \quad (5)$$

where  $\lambda = V_f(q_i) - V_f(q_f)$  is the reorganization energy (see figure S1).

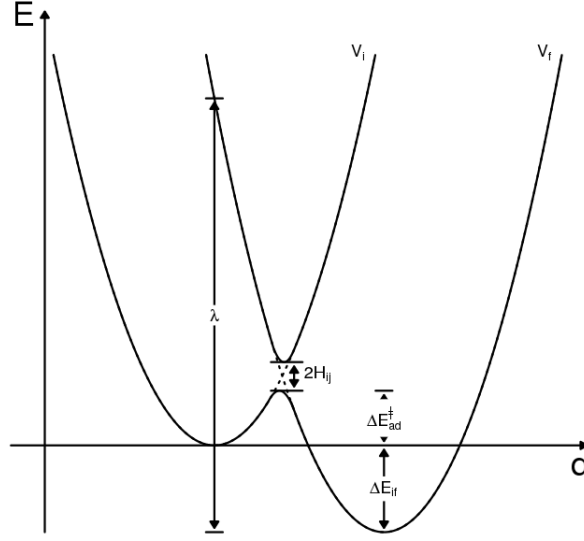

Figure S1: Adiabatic and non-adiabatic curves for an asymmetric electron transfer reaction.

When the initial and final electronic states interact significantly, they will be coupled by the Hamiltonian matrix element  $H_{if} = H_{fi}$ . This coupling is assumed to be independent of  $q$ . In the limit of slow nuclear motions, the so-called adiabatic (ad) potential energy curves,  $W_{\pm}(q)$ , are obtained by solving the secular equation:

$$\begin{vmatrix} V_i(q) - W_{\pm}(q) & H_{if} \\ H_{if} & V_f(q) - W_{\pm}(q) \end{vmatrix} = 0. \quad (6)$$

This leads to the following polynomial equation:

$$(1/2fQ_i^2 - W_{\pm})(1/2fQ_f^2 + \Delta E_{if} - W_{\pm}) - H_{if}^2 = 0 \quad (7)$$

$$\text{with } Q_i = q - q_i \text{ and } Q_f = q - q_f$$

To find the expression of the adiabatic free energy barrier, equation (7) has been solved at the initial ( $q_i$ ) and transition ( $q_c$ ) state geometries, assuming that their position is unchanged on going from the diabatic to the adiabatic states. First, one can demonstrate that the discriminant of the previous polynomial can be written as:

$$D = (1/2f(Q_i^2 - Q_f^2) - \Delta E_{if})^2 + H_{if}^2 \quad (8)$$

1) At the initial state geometry ( $Q_i = 0$  and  $Q_f = q_i - q_f$ ) the discriminant simplifies to:

$$D = (\lambda + \Delta E_{if})^2 + 4H_{if}^2 \quad (9)$$

and the adiabatic potential energies at this point are:

$$W_{\pm} = \frac{\lambda + \Delta E_{if}}{2} \pm \sqrt{\frac{(\lambda + \Delta E_{if})^2}{4} + H_{if}^2} \quad (10)$$

2) At the crossing point ( $q = q_c$ ) we can write:

$$Q_i = \frac{\Delta E_{if} + \lambda}{f(q_f - q_i)} \quad Q_f = \frac{\Delta E_{if} - \lambda}{f(q_f - q_i)} \quad (11)$$

and then:

$$1/2f (Q_i^2 - Q_f^2) = \Delta E_{if} \quad 1/2f (Q_i^2 + Q_f^2) = \frac{\Delta E_{if}^2 + \lambda^2}{2\lambda} \quad (12)$$

At this point the discriminant is  $D = 4H_{if}^2$  and the adiabatic potential energies are:

$$W_{\pm} = \frac{(\lambda + \Delta E_{if})^2}{4\lambda} \pm H_{if} = \Delta E_{na}^{\dagger} \pm H_{if}. \quad (13)$$

Finally, we can determine the adiabatic free energy barrier by calculating the difference between the transition state and initial energies:

$$\Delta E_{ad}^{\dagger} = W_{-}(q_c) - W_{-}(q_i) = \Delta E_{na}^{\dagger} - \Delta$$

with  $\Delta = H_{if} + \frac{\lambda + \Delta E_{if}}{2} - \sqrt{\frac{(\lambda + \Delta E_{if})^2}{4} + H_{if}^2}$  (14)

## 2 Electron transfer rates

The rate constant for electron transfer in the semi-classical approximation ( $k_{sc}$ , referred as the Landau-Zener or LZ rate in the main article) can be related to the classical rate constant  $k_{cl}$  by introducing a thermally averaged electronic transmission coefficient  $\kappa_{el}$  and the nuclear tunneling factor  $\Gamma_n$  ( $\kappa_{el} = 1 \Rightarrow$  adiabatic,  $\kappa_{el} \neq 1 \Rightarrow$  non-adiabatic;  $\Gamma_n = 1 \Rightarrow$  no tunneling effects,  $\Gamma_n \neq 1 \Rightarrow$  tunneling effects) [1]:

$$k_{LZ} = k_{sc} = \kappa_{el} \Gamma_n k_{cl} \quad (15)$$

$$k_{cl} = \nu_{eff} \exp \{ -\beta (\Delta E_{na}^{\dagger} - \Delta) \} \quad (16)$$

where  $\nu_{eff}$  is the frequency along the reaction coordinate. The electronic transmission is given by:

$$\kappa_{el} = \frac{2P_{LZ}}{1 + P_{LZ}} \quad (17)$$

$$P_{LZ} = 1 - \exp(-2\pi\gamma) \quad (18)$$

$$2\pi\gamma = \frac{\pi^{3/2} |H_{if}|^2}{\hbar \nu_{eff} \sqrt{\lambda k_B T}} \quad (19)$$

where  $P_{LZ}$  is the Landau-Zener transition probability for a single surface crossing event. The parameter  $2\pi\gamma$  determines the adiabaticity of the reaction. If  $2\pi\gamma \ll 1$  the reaction is non-adiabatic and the exponent in equation (18) can be expanded in a Taylor series and truncated after the first order term, giving  $P_{LZ} = 2\pi\gamma$  and  $\kappa_{el} = 2P_{LZ}$ . Insertion

of this result into equation 15 and assuming that  $\lambda + \Delta E_{if} \gg |H_{if}|$  ( $\Delta \approx 0$ ) gives the non-adiabatic (or Marcus) ET rate [1, 2, 3]:

$$k_{Marcus} = \frac{2\pi}{\hbar} |H_{if}|^2 \sqrt{\frac{1}{4\pi\lambda k_B T}} \exp(-\beta \Delta E_{na}^\ddagger) \quad (20)$$

In the opposite limit  $2\pi\gamma \gg 1$ , the ET is adiabatic and  $P_{LZ}$  and  $\kappa_{el}$  approach unity. The rate expression is the same as for “standard” chemical reactions in the classical transition state approximation  $k_{ad} = k_{cl}$  [2].

On the other hand, a full quantum-mechanical treatment of non-adiabatic transitions, based upon Fermi’s golden rule, leads to the Marcus-Levich-Jortner (MLJ) rate equation:

$$k_{MLJ} = \frac{2\pi}{\hbar} |H_{if}|^2 \sqrt{\frac{1}{4\pi\lambda_s k_B T}} \sum_{n=0}^{\infty} \exp(-S_{eff}) \frac{S_{eff}^n}{n!} \exp\left\{-\frac{(\Delta E_{if} + \lambda_s + n\hbar\omega_{eff})^2}{4\lambda_s k_B T}\right\} \quad (21)$$

with  $\lambda_i = \hbar\nu_{eff}S_{eff} = \hbar\omega_{eff}S_{eff}$ , which turns out [1, 4, 5, 6] to be equivalent to the Marcus expression in the case of an ET reaction driven by solvent coordinates [7].

The evolution of the Marcus, MLJ and LZ rate expressions as a function of the site energy difference and the electronic coupling can be compared on Figure S2. Notice the similarity between the LZ and the Marcus rates, as the latter is the non-adiabatic limit of the former, and how different is the contour map of the MLJ expression in comparison with the other two.

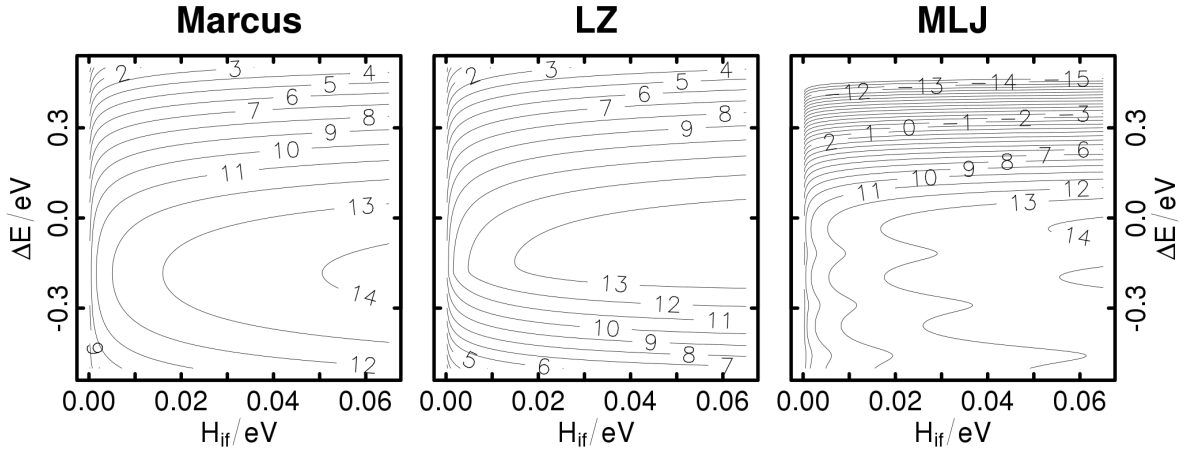

Figure S2: Contour plots of the decimal logarithm of the Marcus (left), LZ (Middle) and MLJ (right) rate expressions as a function of the site energy difference and the electronic coupling, setting the reorganization energies ( $\lambda_i = 0.147$  eV and  $\lambda_s = 0.036$  eV) and effective mode frequency ( $\hbar\nu_{eff} = 0.179$  eV) to the values calculated for PCBM.

### 3 Reorganization energies

Hung-Rhys (HR) factors were obtained from the dimensionless displacement parameters  $B_j$  usually employed in the evaluation of the Franck-Condon (FC) vibronic progressions in electronic spectra [8]. The latter, assuming the harmonic approximation, are defined as:

$$B_j = \sqrt{\frac{\nu_j}{h}} (X_K - X_H) M^{1/2} L_j (K) \quad (22)$$

where  $X_{K,H}$  are the 3N dimensional vectors of the equilibrium Cartesian coordinates of the  $K, H^{th}$  state (here the neutral and negative molecular states),  $M$  is the 3N×3N diagonal matrix of the atomic masses, and  $L_j (K)$  is the 3N vector describing the normal coordinate  $Q_j$  of the  $K$  state in terms of mass-weighted Cartesian coordinates. The HR factors were evaluated from:

$$S_j = \frac{1}{2} B_j^2 \quad (23)$$

Table S1: Huang-Rhys factors for C<sub>60</sub>, PCBM and ThCBM (only  $S_j > 0.005$  are reported)

| C <sub>60</sub>     |        | PCBM                |        | ThCBM               |        |
|---------------------|--------|---------------------|--------|---------------------|--------|
| $\nu_{eff}/cm^{-1}$ | $S_j$  | $\nu_{eff}/cm^{-1}$ | $S_j$  | $\nu_{eff}/cm^{-1}$ | $S_j$  |
| 300.3               | 0.0062 | 14.0                | 0.3072 | 13.8                | 0.2034 |
| 312.9               | 0.0688 | 18.6                | 0.1790 | 19.4                | 0.5953 |
| 430.1               | 0.0067 | 23.1                | 0.1821 | 24.1                | 0.2383 |
| 484.8               | 0.0056 | 42.0                | 0.0688 | 42.0                | 0.1571 |
| 486.6               | 0.0235 | 46.8                | 0.0177 | 58.0                | 0.0223 |
| 495.6               | 0.0068 | 53.5                | 0.0106 | 63.6                | 0.0081 |
| 564.8               | 0.0056 | 66.7                | 0.0136 | 98.7                | 0.0054 |
| 576.1               | 0.0139 | 105.0               | 0.0184 | 106.3               | 0.0674 |
| 705.3               | 0.0072 | 107.2               | 0.0214 | 177.1               | 0.0075 |
| 709.4               | 0.0113 | 128.5               | 0.0071 | 206.7               | 0.0191 |
| 730.0               | 0.0345 | 210.0               | 0.0146 | 240.7               | 0.0061 |
| 764.4               | 0.0164 | 272.3               | 0.0181 | 254.4               | 0.0052 |
| 783.6               | 0.0256 | 282.8               | 0.0154 | 263.8               | 0.0053 |
| 802.2               | 0.0640 | 300.5               | 0.0191 | 266.5               | 0.0187 |
| 837.7               | 0.0289 | 428.5               | 0.0855 | 285.0               | 0.0155 |
| 838.1               | 0.0241 | 436.2               | 0.0477 | 307.4               | 0.0185 |
| 1017.7              | 0.0392 | 455.1               | 0.0201 | 429.2               | 0.0948 |
| 1128.5              | 0.0505 | 486.6               | 0.0154 | 437.5               | 0.0328 |
| 1200.5              | 0.0169 | 488.7               | 0.0147 | 455.6               | 0.0243 |
| 1292.1              | 0.0133 | 540.0               | 0.0172 | 487.7               | 0.0227 |
| 1308.5              | 0.0065 | 704.8               | 0.0486 | 489.8               | 0.0070 |
| 1363.4              | 0.0101 | 706.6               | 0.0094 | 543.3               | 0.0167 |
| 1435.5              | 0.0087 | 706.8               | 0.0162 | 706.6               | 0.0122 |
| 1543.6              | 0.0386 | 714.4               | 0.0075 | 707.7               | 0.0451 |
| 1597.3              | 0.0091 | 721.1               | 0.0300 | 709.0               | 0.0453 |
| 1603.5              | 0.0200 | 732.1               | 0.0071 | 710.6               | 0.0073 |
|                     |        | 755.9               | 0.0149 | 722.9               | 0.0434 |
|                     |        | 767.1               | 0.0123 | 723.8               | 0.0096 |
|                     |        | 903.7               | 0.1203 | 732.3               | 0.0053 |
|                     |        | 908.8               | 0.0093 | 733.2               | 0.0057 |
|                     |        | 1132.6              | 0.0119 | 753.9               | 0.0079 |
|                     |        | 1221.8              | 0.0259 | 767.0               | 0.0162 |
|                     |        | 1222.2              | 0.0057 | 900.2               | 0.0383 |
|                     |        | 1274.3              | 0.0054 | 902.6               | 0.2838 |
|                     |        | 1454.8              | 0.0442 | 1032.7              | 0.0060 |
|                     |        | 1457.4              | 0.0074 | 1131.5              | 0.0127 |
|                     |        | 1490.8              | 0.0943 | 1222.4              | 0.0696 |
|                     |        | 1491.0              | 0.0055 | 1454.5              | 0.0458 |
|                     |        | 1492.8              | 0.0145 | 1457.4              | 0.0066 |
|                     |        | 1596.0              | 0.0165 | 1490.7              | 0.0955 |
|                     |        | 1601.8              | 0.0255 | 1492.7              | 0.0399 |
|                     |        | 1826.4              | 0.0667 | 1596.0              | 0.0148 |
|                     |        | 3067.2              | 0.0100 | 1601.7              | 0.0269 |
|                     |        | 3068.0              | 0.0495 | 1827.5              | 0.1667 |
|                     |        |                     |        | 3067.9              | 0.1472 |
|                     |        |                     |        | 3068.9              | 0.0198 |

## 4 Electronic properties

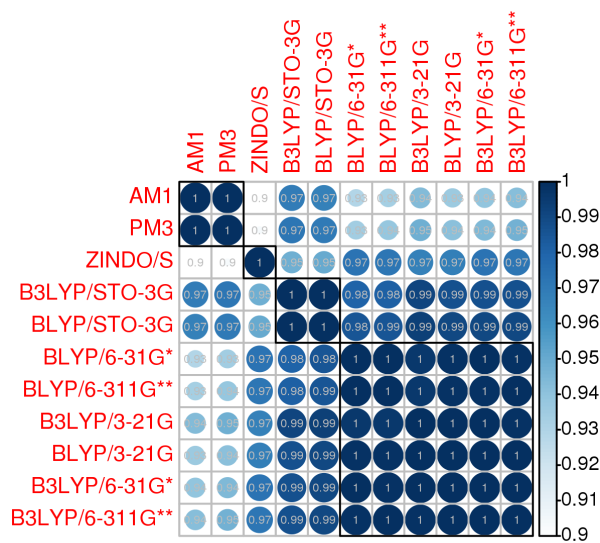

Figure S3: Correlation diagram of the site energies calculated between the L0, L1 and L2 orbitals of 7 different PCBM dimers at different DFT and semi-empirical levels.

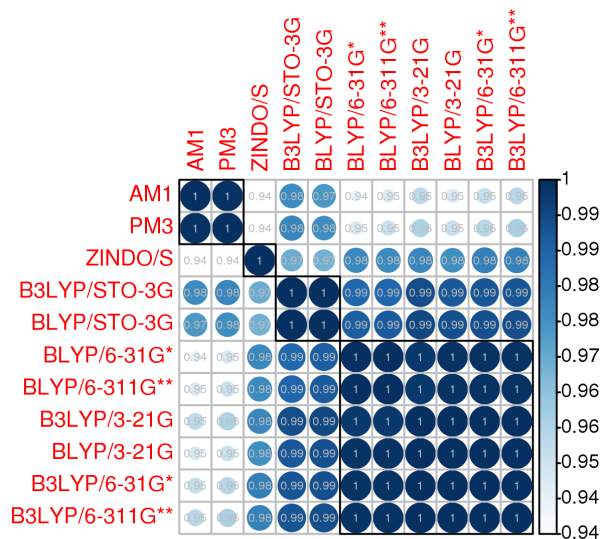

Figure S4: Correlation diagram of the site energy differences calculated between the L0, L1 and L2 orbitals of 7 different PCBM dimers at different DFT and semi-empirical levels.

## 5 Results for the Marcus and MLJ rate expressions

The ET rates forming the F1-networks calculated with the Marcus and MLJ expressions are reported in Figures S5 and S6. Like those from the LZ expression which are plotted in the main text, they are represented by cones whose basis areas are proportional to the rates. As the LZ, Marcus and MLJ expressions can sometimes furnish ET rates differing by orders of magnitude, different scaling factors have been used to represent these three sets of data. Despite this difference in the representations of the rates in Figures 6, S5 and S6, we can clearly notice the good qualitative agreement of the results provided by the three expressions. Only a small disagreement can be noticed in the size of the cones for some particularly asymmetric pathways defined between non-equivalent sites in the triclinic structures. These differences can be rationalized by carefully analysing the position of these pathways on the maps of the LZ, Marcus and MLJ rates in Figure S2.

Figures S7 and S8 represent the effective hopping probabilities resulting from our KMC simulations performed on the Marcus and MLJ F1-networks. Those for the simulations including the L1 and L2 orbitals (F3-network) are given in Figures S9 and S10. Again, the agreement between the results obtained with the three rate expressions is evident. The dimensionality and main transport directions of the F1- and F3-networks found with the LZ expression are retained when using the Marcus or MLJ ones. The mobility tensors obtained from these KMC simulations are compiled in Tables S2 (Marcus) and S3 (MLJ). They are also represented by ellipsoids in Figures S7, S8, S9 and S10. The Marcus and MLJ mobilities are respectively lower ( $\mu_{Marcus} \sim 0.75\mu_{LZ}$ ) and higher ( $\mu_{MLJ} \sim 3\mu_{LZ}$ ) than those obtained with the LZ expression. This can be explained by the fact that electron transport is globally dominated by L0L0 transitions ( $\Delta E_{L0L0} = 0$ ), for which we always have  $k_{Marcus} < k_{LZ} < k_{MLJ}$  in the range of our electronic couplings ( $J < 65$  meV).

Finally, Figures S11, S12 and S13 report histograms of the ET rates for all the crystal structures, respectively calculated with the LZ, Marcus and MLJ expressions. These have been decomposed according to the different molecular orbital contributions. For the PCBM/DCM and PCBM/CS<sub>2</sub> structures, the separation between the distributions of the rates forming the F1-network (L0L0 transitions) and those allowing to escape it, which was observed for the LZ expression in the main text, is also visible for the other two expressions. This confirmed the insensitivity of these two structures to the inclusion of the L1 and L2 orbitals in the percolation network. Notice for the MLJ expression that the endothermal transitions can display extremely small ET rates (lower than  $1s^{-1}$ ). This is consistent with the landscape of the map of the MLJ expression in Figure S2 which abruptly decrease when  $\Delta E$  increases, in the region of  $\Delta E > 0$ . The main difference between Figures S11 and S12 is that the Marcus expression provides higher ET rates for strongly exothermal transitions (L2L0). Again, this is consistent with the maps in Figure S2, which show that the Marcus ET rates are always larger than the LZ ones when  $\Delta E < -0.18$  eV.



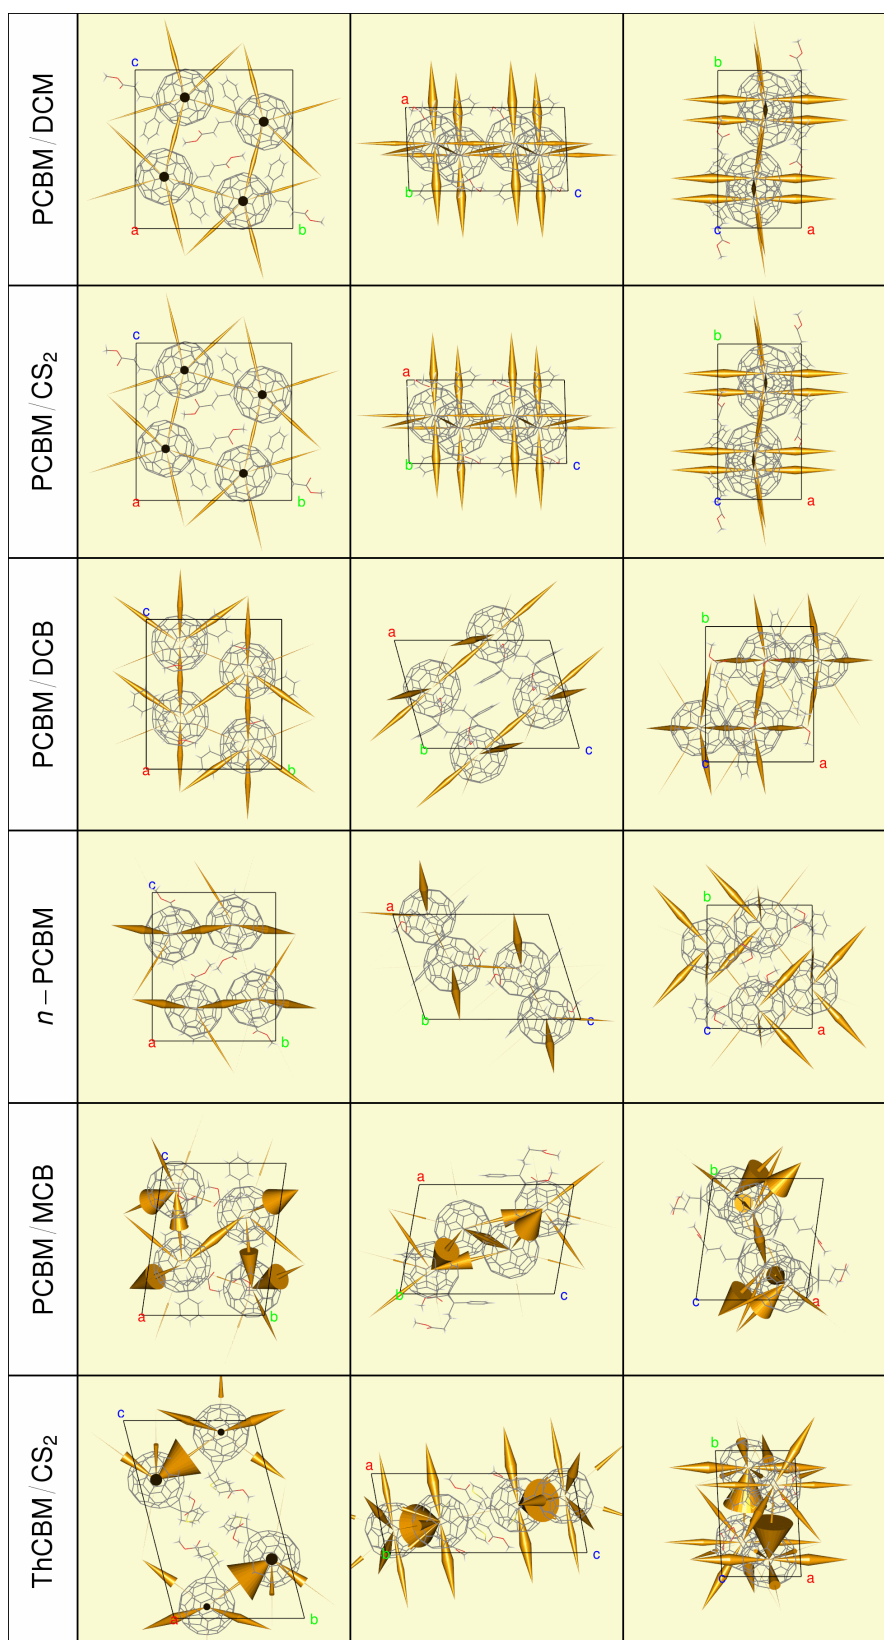

Figure S5: Representation of the Marcus ET rates for the L0L0 transitions (cones with bases proportional to the rates, pointing towards the destination fullerene), forming the F1-networks.

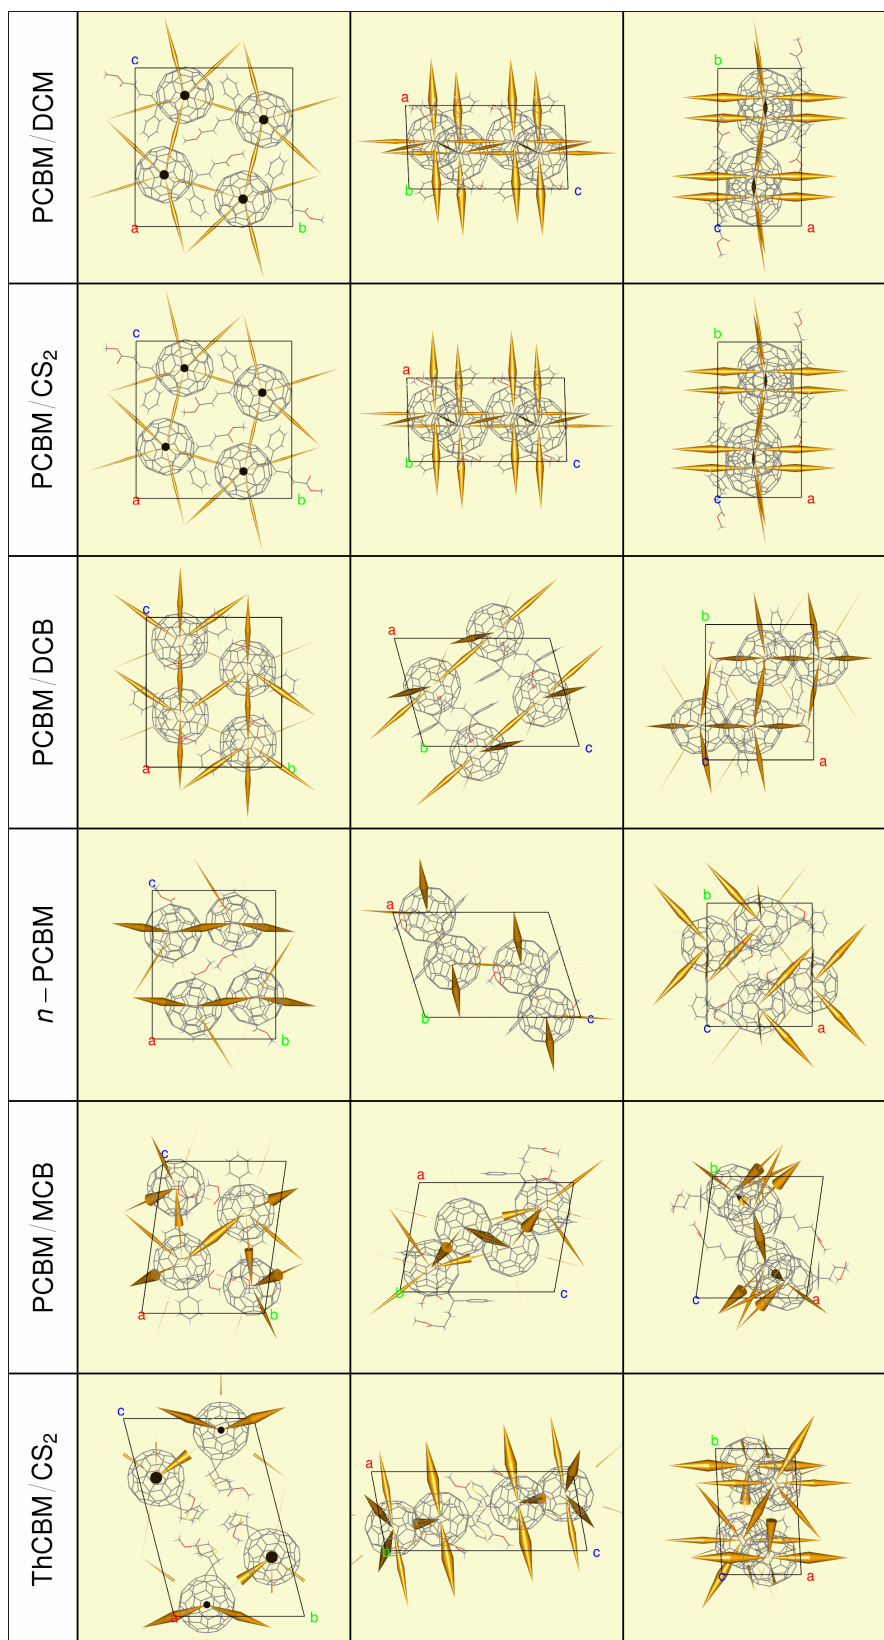

Figure S6: Representation of the MLJ ET rates for the L0L0 transitions (cones with bases proportional to the rates, pointing towards the destination fullerene), forming the F1-networks.

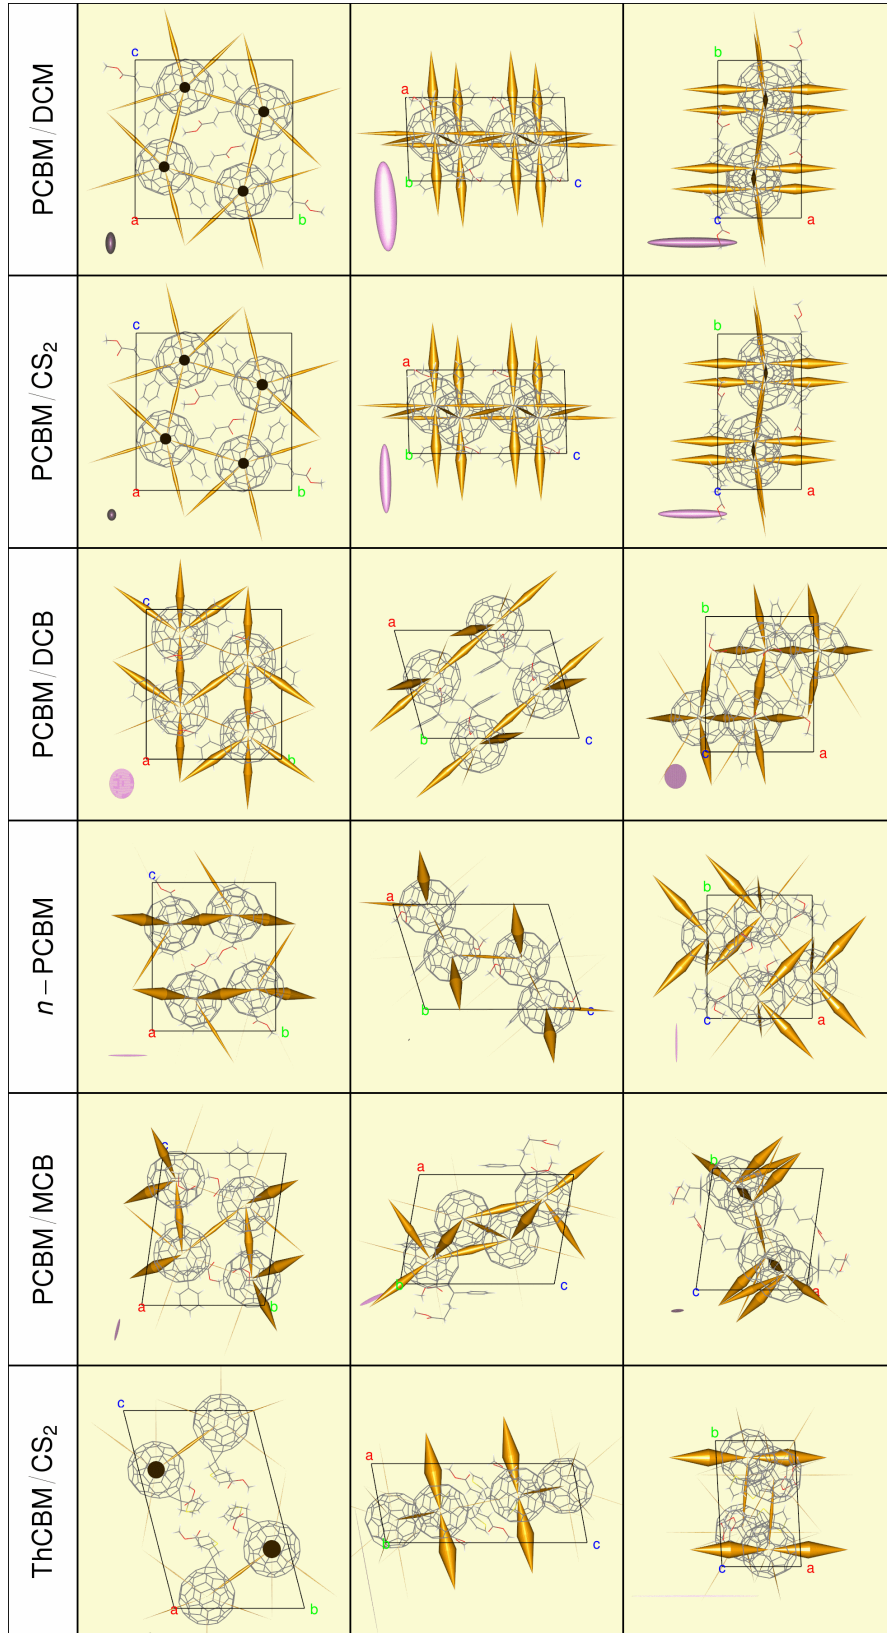

Figure S7: Effective hopping probabilities (cones) and associated mobility tensors (ellipsoids) within the F1-networks, obtained for the Marcus expression.

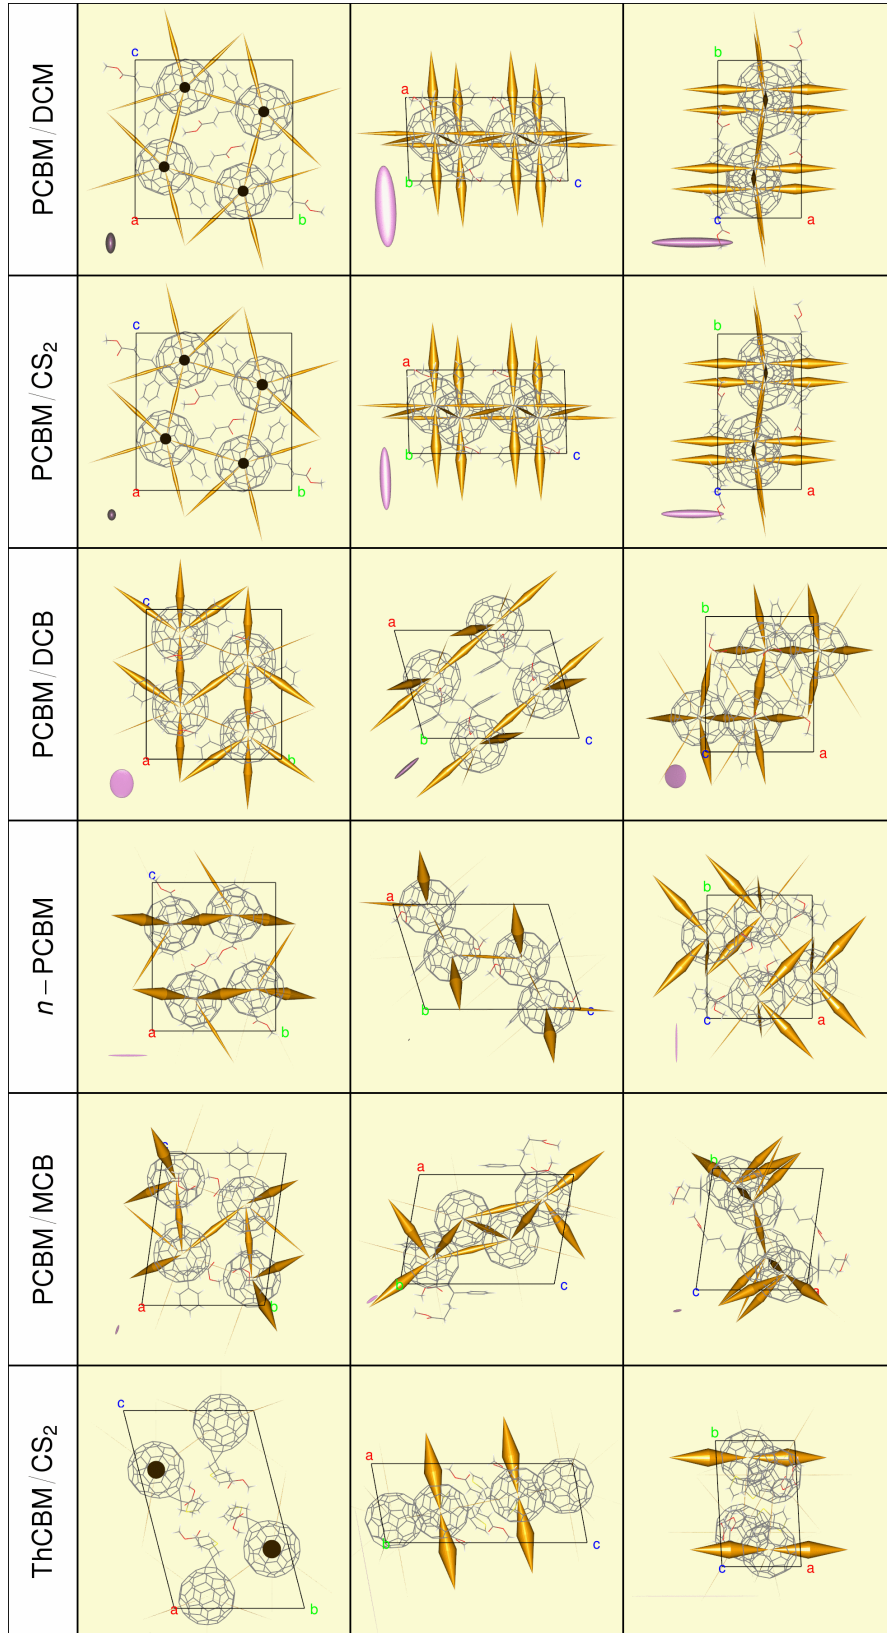

Figure S8: Effective hopping probabilities (cones) and associated mobility tensors (ellipsoids) within the F1-networks, obtained for the MLJ expression.

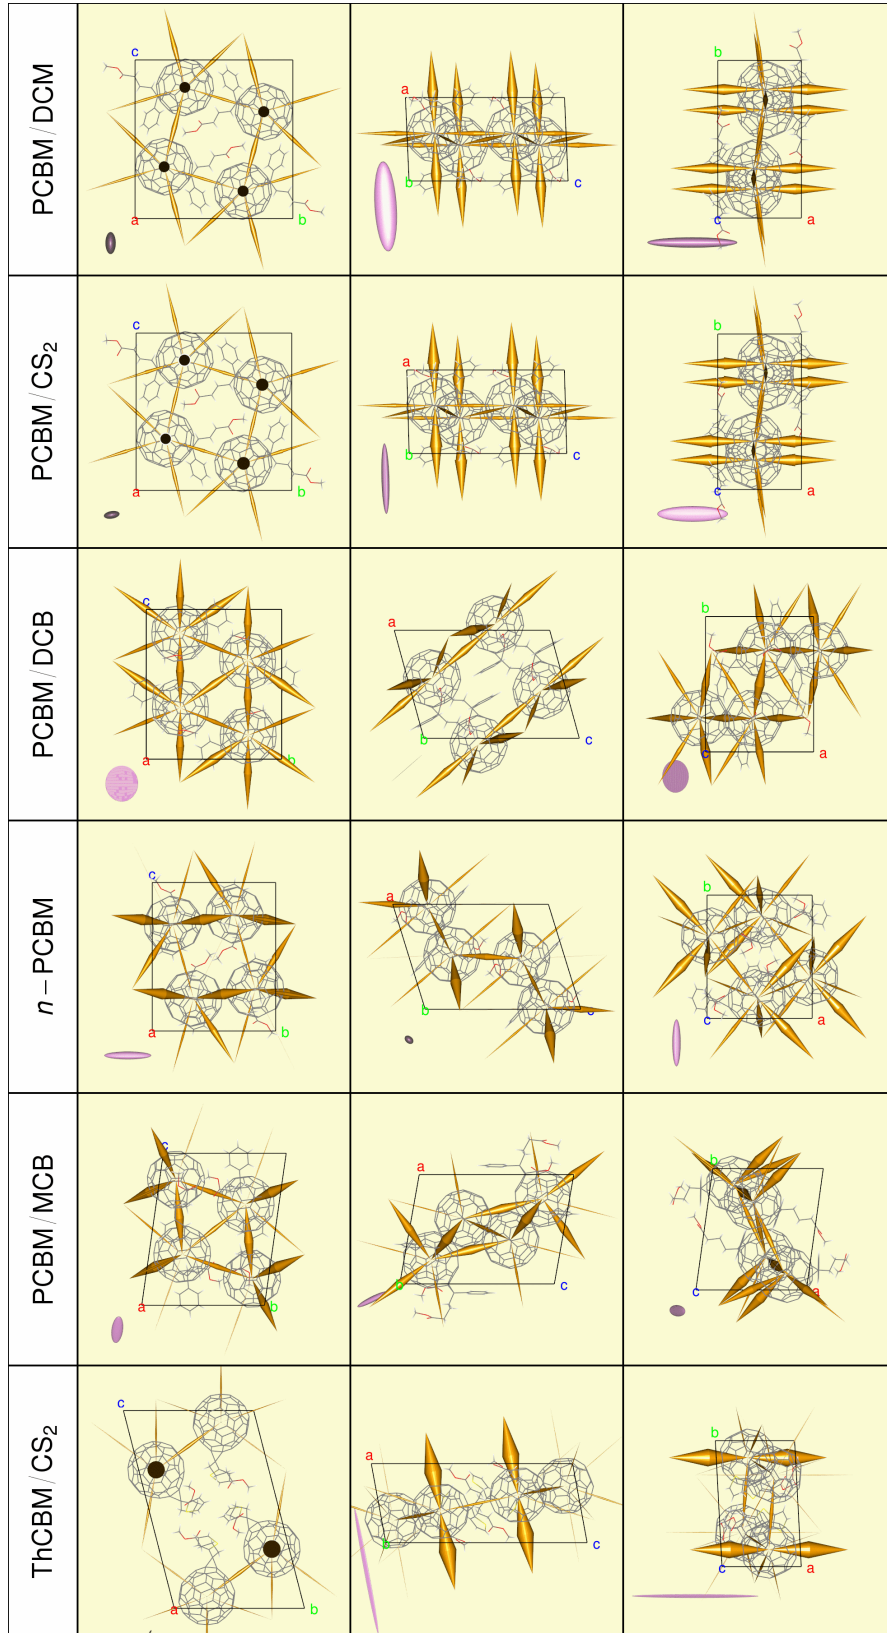

Figure S9: Effective hopping probabilities (cones) and associated mobility tensors (ellipsoids) within the F3-networks, obtained from the Marcus expression.



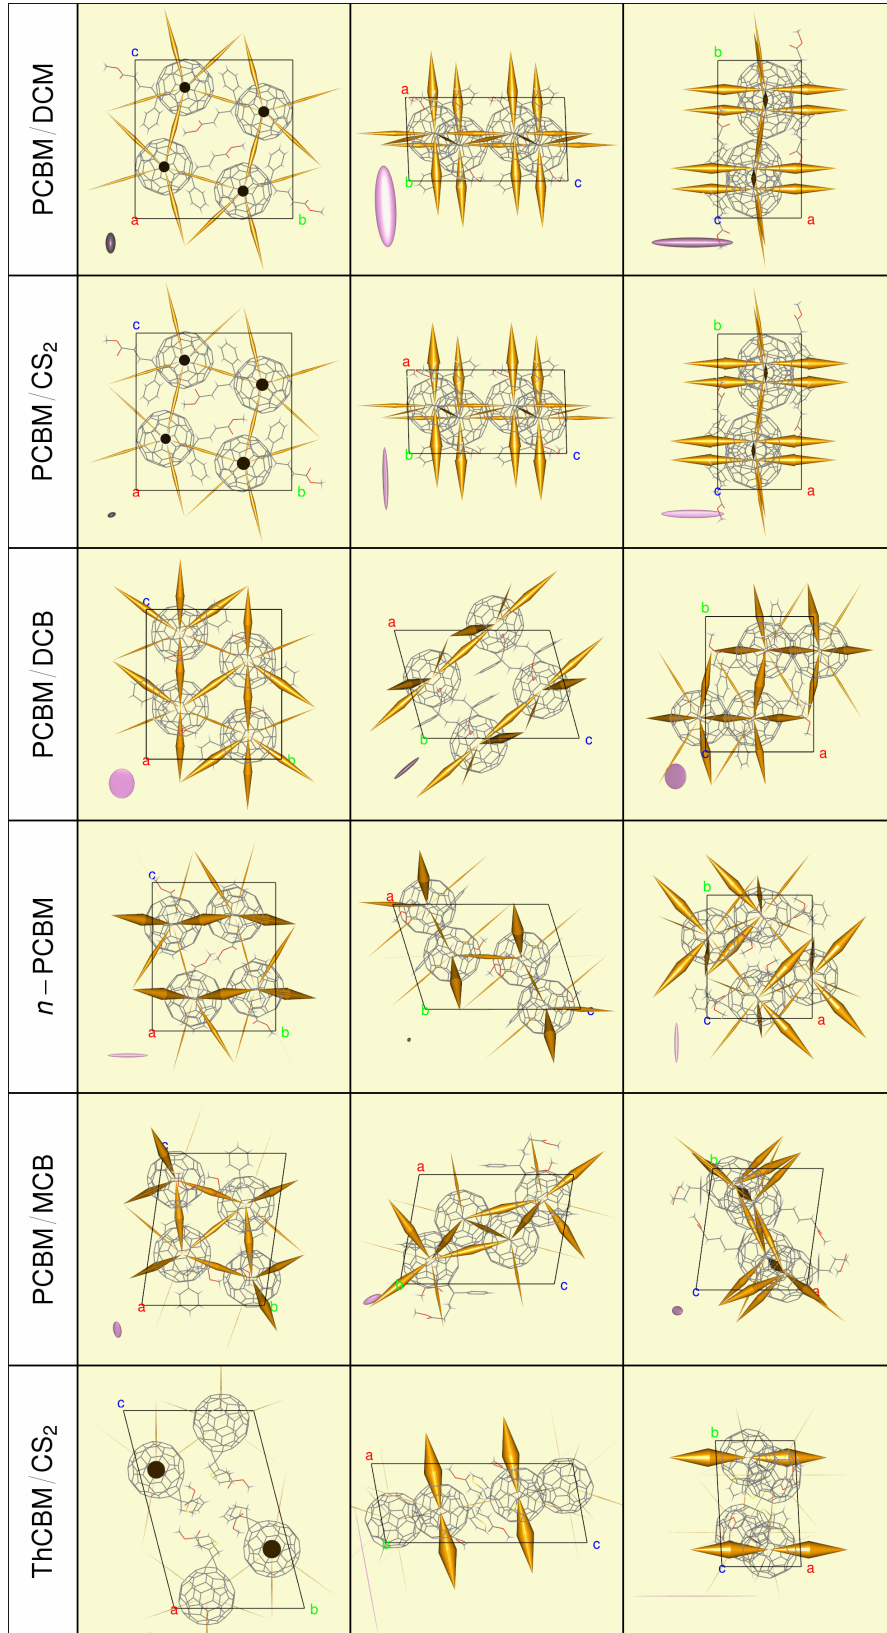

Figure S10: Effective hopping probabilities (cones) and associated mobility tensors (ellipsoids) within the F3-networks, obtained from the MLJ expression.

| PCBM/DCM |             |              |       |       | PCBM/CS <sub>2</sub>  |              |       |       |       |
|----------|-------------|--------------|-------|-------|-----------------------|--------------|-------|-------|-------|
|          | Eigenvalues | Eigenvectors |       |       | Eigenvalues           | Eigenvectors |       |       |       |
|          |             | x            | y     | z     |                       | x            | y     | z     |       |
| F1       | 0.69        | -1.00        | 0.00  | 0.01  | F1                    | 0.53         | -1.00 | 0.00  | 0.01  |
|          | 0.17        | 0.01         | 0.00  | 1.00  |                       | 0.09         | 0.01  | 0.01  | 1.00  |
|          | 0.08        | 0.00         | -1.00 | 0.00  |                       | 0.07         | 0.00  | -1.00 | 0.01  |
| F3       | 0.69        | -1.00        | 0.00  | 0.01  | F3                    | 0.54         | 1.00  | 0.00  | 0.00  |
|          | 0.17        | -0.01        | 0.00  | -1.00 |                       | 0.12         | 0.00  | 0.98  | 0.19  |
|          | 0.08        | 0.00         | 1.00  | 0.00  |                       | 0.05         | 0.00  | -0.13 | 0.99  |
| PCBM/DCB |             |              |       |       | <i>n</i> -PCBM        |              |       |       |       |
|          | Eigenvalues | Eigenvectors |       |       | Eigenvalues           | Eigenvectors |       |       |       |
|          |             | x            | y     | z     |                       | x            | y     | z     |       |
| F1       | 0.25        | -0.43        | 0.00  | -0.90 | F1                    | 0.30         | 0.00  | 1.00  | 0.00  |
|          | 0.19        | 0.00         | -1.00 | 0.00  |                       | 0.02         | -0.62 | 0.00  | -0.79 |
|          | 0.00        | 0.90         | 0.00  | -0.43 |                       | 0.01         | -0.76 | 0.00  | 0.65  |
| F3       | 0.30        | 0.43         | 0.00  | 0.90  | F3                    | 0.36         | 0.00  | -1.00 | 0.00  |
|          | 0.25        | 0.00         | 1.00  | 0.00  |                       | 0.08         | 0.83  | 0.00  | -0.55 |
|          | 0.00        | 0.91         | 0.00  | -0.42 |                       | 0.06         | -0.53 | 0.00  | -0.85 |
| PCBM/MCB |             |              |       |       | ThCBM/CS <sub>2</sub> |              |       |       |       |
|          | Eigenvalues | Eigenvectors |       |       | Eigenvalues           | Eigenvectors |       |       |       |
|          |             | x            | y     | z     |                       | x            | y     | z     |       |
| F1       | 0.22        | 0.62         | 0.18  | 0.76  | F1                    | 1.00         | 1.00  | 0.00  | 0.00  |
|          | 0.04        | 0.80         | -0.06 | -0.60 |                       | 0.01         | 0.00  | -0.99 | -0.16 |
|          | 0.03        | 0.04         | -0.98 | 0.17  |                       | 0.00         | 0.00  | -0.18 | 0.98  |
| F3       | 0.25        | 0.60         | 0.12  | 0.79  | F3                    | 0.99         | 1.00  | 0.00  | 0.00  |
|          | 0.09        | -0.07        | -0.98 | 0.18  |                       | 0.04         | 0.00  | -0.50 | -0.87 |
|          | 0.06        | 0.81         | -0.16 | -0.57 |                       | 0.01         | 0.00  | -0.90 | 0.44  |
| R1       | 0.05        | 1.00         | 0.00  | 0.00  | R1                    | 0.95         | 1.00  | 0.00  | 0.00  |
|          | 0.00        | 0.01         | 1.00  | 0.00  |                       | 0.00         | 0.00  | -0.18 | -0.98 |
|          | 0.00        | 0.00         | 0.95  | 0.30  |                       | 0.00         | 0.00  | -0.50 | 0.87  |
| R3       | 0.06        | 1.00         | 0.00  | 0.00  | R3                    | 0.95         | 1.00  | 0.00  | 0.00  |
|          | 0.00        | 0.01         | 1.00  | 0.00  |                       | 0.00         | 0.00  | -0.18 | -0.98 |
|          | 0.00        | 0.00         | 0.84  | 0.55  |                       | 0.00         | 0.00  | -0.39 | 0.92  |

Table S2: Eigenvalues ( $\text{cm}^2\text{V}^{-1}\text{s}^{-1}$ ) and eigenvectors of the mobility tensors calculated considering either the F1-, F3-, R1- or R3-networks (using the Marcus rates) for each crystal structure.

| PCBM/DCM |             |              |       |       | PCBM/CS <sub>2</sub>  |              |       |       |       |
|----------|-------------|--------------|-------|-------|-----------------------|--------------|-------|-------|-------|
|          | Eigenvalues | Eigenvectors |       |       | Eigenvalues           | Eigenvectors |       |       |       |
|          |             | x            | y     | z     |                       | x            | y     | z     |       |
| F1       | 2.09        | -1.00        | 0.00  | 0.02  | F1                    | 1.61         | -1.00 | 0.00  | 0.01  |
|          | 0.54        | 0.02         | 0.00  | 1.00  |                       | 0.29         | 0.01  | 0.02  | 1.00  |
|          | 0.26        | 0.00         | -1.00 | 0.00  |                       | 0.22         | 0.00  | -1.00 | 0.02  |
| F3       | 2.09        | -1.00        | 0.00  | 0.02  | F3                    | 1.61         | 1.00  | 0.00  | -0.01 |
|          | 0.54        | 0.02         | 0.00  | 1.00  |                       | 0.23         | 0.00  | 0.91  | 0.41  |
|          | 0.26        | 0.00         | -1.00 | 0.00  |                       | 0.12         | 0.00  | -0.31 | 0.95  |
| PCBM/DCB |             |              |       |       | <i>n</i> -PCBM        |              |       |       |       |
|          | Eigenvalues | Eigenvectors |       |       | Eigenvalues           | Eigenvectors |       |       |       |
|          |             | x            | y     | z     |                       | x            | y     | z     |       |
| F1       | 0.83        | -0.43        | 0.00  | -0.90 | F1                    | 1.01         | 0.00  | 1.00  | 0.00  |
|          | 0.61        | 0.00         | -1.00 | 0.00  |                       | 0.07         | -0.62 | 0.00  | -0.79 |
|          | 0.00        | 0.88         | 0.00  | -0.48 |                       | 0.02         | -0.73 | 0.00  | 0.68  |
| F3       | 0.85        | 0.43         | 0.00  | 0.90  | F3                    | 1.03         | 0.00  | 1.00  | 0.00  |
|          | 0.66        | 0.00         | 1.00  | 0.00  |                       | 0.12         | -0.69 | 0.00  | -0.73 |
|          | 0.00        | 0.88         | 0.00  | -0.47 |                       | 0.09         | -0.71 | 0.00  | 0.70  |
| PCBM/MCB |             |              |       |       | ThCBM/CS <sub>2</sub> |              |       |       |       |
|          | Eigenvalues | Eigenvectors |       |       | Eigenvalues           | Eigenvectors |       |       |       |
|          |             | x            | y     | z     |                       | x            | y     | z     |       |
| F1       | 0.36        | 0.76         | 0.22  | 0.62  | F1                    | 3.33         | 1.00  | 0.00  | 0.00  |
|          | 0.11        | 0.70         | -0.10 | -0.71 |                       | 0.01         | 0.00  | -0.73 | -0.68 |
|          | 0.07        | -0.06        | -0.93 | 0.36  |                       | 0.00         | 0.00  | -0.57 | 0.82  |
| F3       | 0.50        | -0.63        | 0.08  | -0.78 | F3                    | 3.32         | 1.00  | 0.00  | 0.00  |
|          | 0.23        | -0.32        | -0.91 | 0.24  |                       | 0.03         | 0.00  | 0.54  | 0.84  |
|          | 0.19        | -0.60        | 0.67  | 0.43  |                       | 0.01         | 0.00  | -0.85 | 0.53  |
| R1       | 0.18        | 1.00         | 0.00  | 0.00  | R1                    | 3.26         | -1.00 | 0.00  | 0.00  |
|          | 0.00        | 0.01         | 1.00  | 0.00  |                       | 0.00         | 0.00  | 0.18  | 0.98  |
|          | 0.00        | 0.00         | 0.83  | 0.56  |                       | 0.00         | 0.00  | -0.87 | 0.49  |
| R3       | 0.20        | 1.00         | 0.00  | 0.00  | R3                    | 3.24         | 1.00  | 0.00  | 0.00  |
|          | 0.00        | 0.01         | 1.00  | 0.00  |                       | 0.00         | 0.00  | -0.18 | -0.98 |
|          | 0.00        | -0.03        | -0.49 | 0.87  |                       | 0.00         | 0.00  | -0.98 | 0.22  |

Table S3: Eigenvalues ( $\text{cm}^2\text{V}^{-1}\text{s}^{-1}$ ) and eigenvectors of the mobility tensors calculated considering either the F1-, F3-, R1- or R3-networks (using the MLJ rates) for each crystal structure.



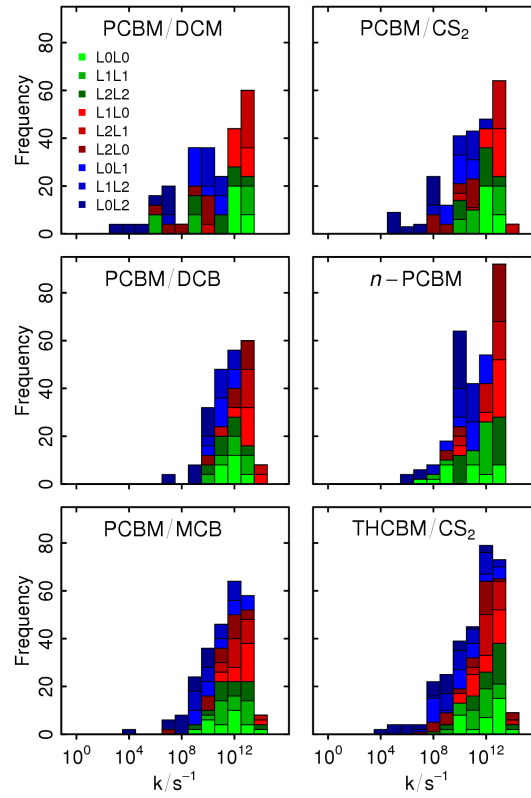

Figure S11: Decomposition by molecular orbital contributions of the LZ rates distributions of the different crystal structures. Green, blue and red bins are respectively the contributions of flat, upward, and downward ETs.

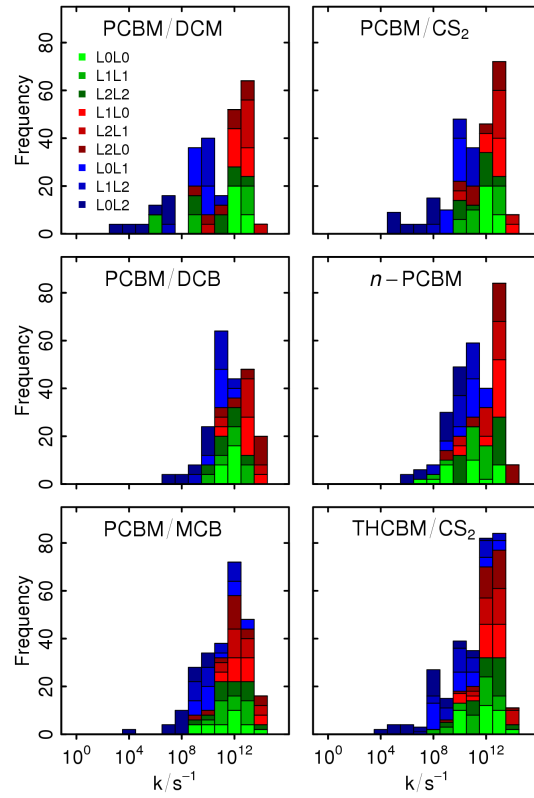

Figure S12: Decomposition by molecular orbital contributions of the Marcus rates distributions of the different crystal structures. Green, blue and red bins are respectively the contributions of flat, upward, and downward ETs.

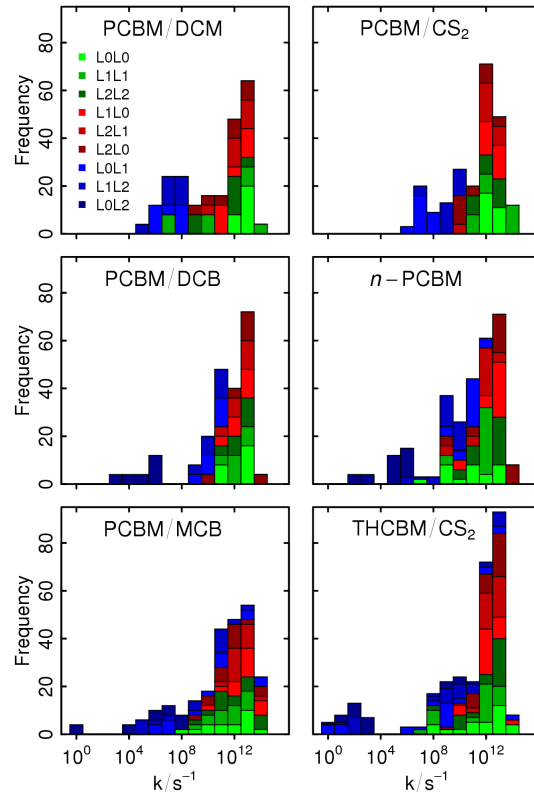

Figure S13: Decomposition by molecular orbital contributions of the MLJ ET rates distributions of the different crystal structures. Green, blue and red bins are respectively the contributions of flat, upward, and downward ETs.

## 6 Electric field dependency

We performed additional KMC simulations on the F1-network (L0L0 transitions only) of the PCBM/CS<sub>2</sub> structure, changing the norm of the applied electric field ( $F$ ).  $F$  was applied along the main direction of the mobility tensor reported in our paper ([100],  $x$ -axis) and scanned over the range  $10^4$ - $10^7$  V cm<sup>-1</sup>. We monitored the evolution of the average (over 16 different KMC simulations) ET rates, the number of hopping events along  $F$  and its opposite direction  $\bar{[100]}$ , as well as the  $x$ -,  $y$ - and  $z$ -components of the drift distance and velocity. These results are reported in Figure S14.

As expected for the transport of negatively charged electrons, the ET rate in the direction of the electric field ([100]) decreases when its norm increases, while in the opposite direction ( $\bar{[100]}$ ) it first increases and then decreases once the inverted region of the rate expression is reached (after  $4 \cdot 10^6$  V cm<sup>-1</sup>). The average of all the other ET rates within the structure is also reported in Figure S14 (green line). As these rates belong to a plane nearly perpendicular to the electric field direction, their average is not very sensitive to the increase in  $F$ . Despite this low sensitivity, these rates enter in competition with the [100] and  $\bar{[100]}$  rates when  $F$  becomes higher than  $\sim 3 \cdot 10^6$  and  $\sim 8 \cdot 10^6$  V cm<sup>-1</sup>, respectively. This competition is at the origin of the sensitivity of the average number of hopping events in that plane, when  $F$  becomes higher than  $3 \cdot 10^6$  V cm<sup>-1</sup>. At low electric fields this number is non-negligible, indicating that the charge spends appreciable time diffusing in this plane during its global drift along the  $\bar{[100]}$  direction. At very high electric field ( $10^7$  V cm<sup>-1</sup>), the charge hops exclusively in this plane.

The plots of the drift distance confirm that the electron drifts in the direction opposite to the electric field. Indeed, the main component of the drift distance is the  $x$ -component, which is always negative ( $dx < 0$ ). At low electric fields, the charge performs a random walk about its starting position, leading to a null drift distance. When we increase the electric field,  $dx$  follow the evolution of the  $\bar{[100]}$  rate. At very high electric fields ( $10^7$  V · cm<sup>-1</sup>),  $dz$  becomes non-negligible while  $dy$  stays null. This is due to the fact that the electron is confined in a plane which is almost but not perfectly orthogonal to  $F$  (in the PCBM/CS<sub>2</sub> structure,  $\alpha = 90^\circ$ ,  $\beta = 91.62^\circ$  and  $\gamma = 90^\circ$ ). Overall, the drift velocity follows the same trend as the drift distance.

Using the previous results, the electron mobility has been evaluated along the electric field direction as:  $\mu(F) = |V_x(F)|/F$ . Looking at this expression, the evolution of  $\mu(F)$  is given by the product of two functions: the drift velocity ( $|V_x(F)|$ ) and the inverse of the electric field ( $1/F$ ). Depending on the evolution of these two functions, the resulting mobility may increase or decrease. In our case, as the inverted region of the rate expression is reached at  $4 \cdot 10^6$  V · cm<sup>-1</sup>, a region where the  $1/F$  function is still decreasing very abruptly,  $\mu(F)$  decreases with  $F$  (see Figure S15).

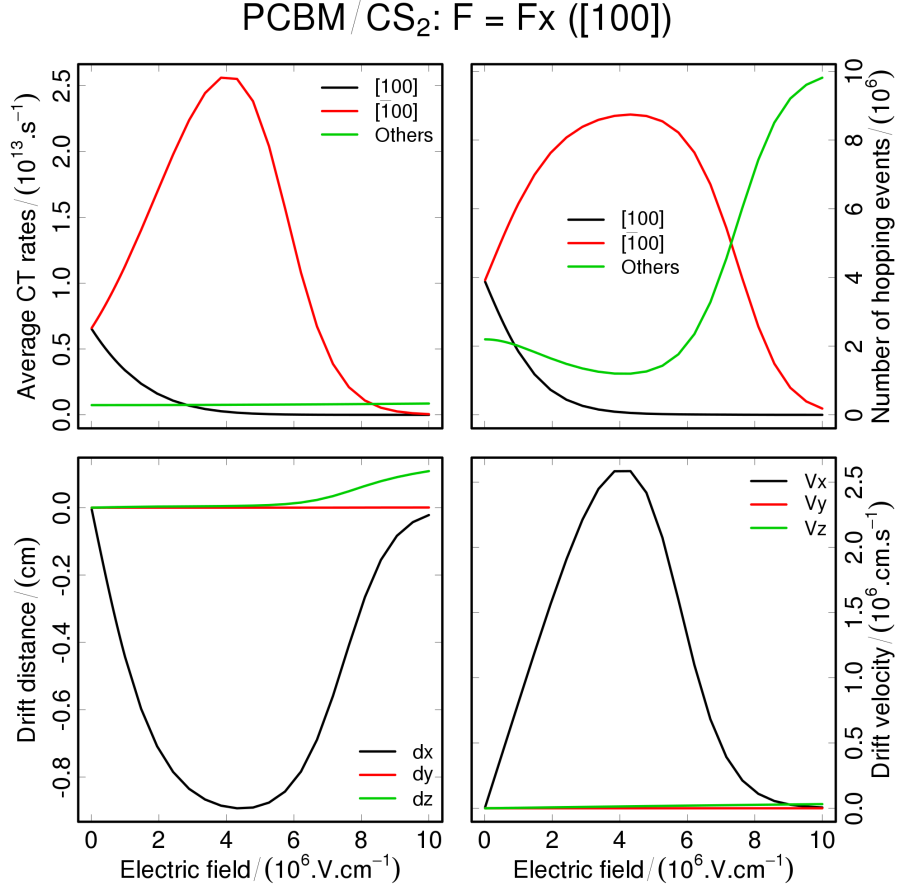

Figure S14: Evolution of the different outputs of the KMC simulations performed to compute the electron mobility as a function of the applied electric field.

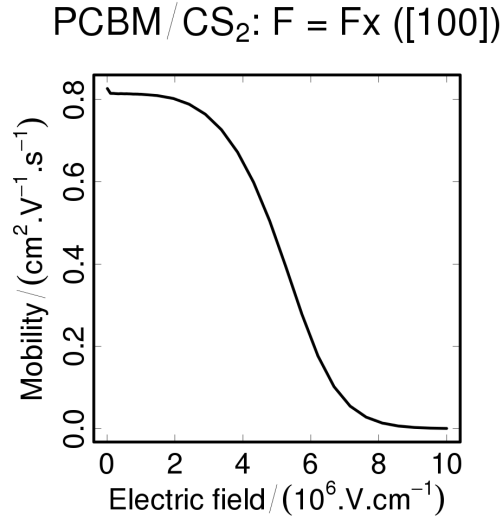

Figure S15: Electron mobility within the PCBM/CS<sub>2</sub> structure as a function of the applied electric field.

## References

- [1] B. S. Brunschwig, J. Logan, M. D. Newton, and N. Sutin. A semiclassical treatment of electron-exchange reactions. application to the hexaaquoiron(ii)-hexaaquoiron(iii) system. *Journal of the American Chemical Society*, 102:5799–5809, 1980.
- [2] H. Oberhofer and J. Blumberger. Revisiting electronic couplings and incoherent hopping models for electron transport in crystalline  $c_{60}$  at ambient temperatures. *Physical Chemistry Chemical Physics*, 14:13846–13852, 2012.
- [3] R.A. Marcus. On the theory of oxidation-reduction reactions involving electron transfer. i. *Journal of Chemical Physics*, 24:966, 1956.
- [4] V. Rühle, A. Lukyanov, F. May, M. Schrader, T. Vehoff, J. Kirkpatrick, B. Baumeier, and D. Andrienko. Microscopic simulations of charge transport in disordered organic semiconductors. *Journal of Chemical Theory and Computation*, 7:3335–3345, 2011.
- [5] R.A. Marcus. Electron transfer reactions in chemistry. theory and experiment. *Reviews of Modern Physics*, 65:599, 1993.
- [6] R. Silbey, J. Jortner, S. A. Rice, and M. T. Vala Jr. Exchange effects on the electron and hole mobility in crystalline anthracene and naphthalene. *Journal of Chemical Physics*, 42:733, 1965.
- [7] *Chemical Dynamics in Condensed Phases*. Oxford University Press, 2006.
- [8] F. Negri and G. Orlandi. The  $t_1$  resonance raman spectra of 1,3,5-hexatriene and its deuterated isotopomers: An *abinitio* re-investigation. *Journal of Chemical Physics*, 103:2412–2419, 1995.
